# Supplementary material for: Phytochemical Study of Some Plant Extracts to Assess their Synergistic Corrosion Inhibition Performance-A Comparative Analysis
Source: Research Square preprint supplement (doi:10.21203/rs.3.rs-4498767/v1), 2024-06-14
Supplement: Supplementary file 1 [file 845a1d24c3dedee1dd39be2e.docx]

**Phytochemical Study of Some Plant Extracts to Assess their Synergistic Corrosion Inhibition Performance-A Comparative Analysis**

Emmanuel, Joseph1,*, Ngasoh, Fayen2, Bello, Abdulhakeem3. Anye, Vitalis4, Onwualu, Azikiwe5*.

1 Materials Science & Engineering, African University of Science & Technology Abuja, Nigeria

2 Mechanical/Materials Engineering, African University of Science & Technology Abuja, Nigeria

3 Theoretical/Applied Physics, African University of Science & Technology Abuja, Nigeria

4 Mechanical/Materials Engineering, African University of Science & Technology Abuja, Nigeria

5 Mechanical/Materials Engineering, African University of Science & Technology Abuja, Nigeria

* Corresponding authors: jitodo@student.aust.edu.ng; [aonwualu@aust.edu.ng](mailto:aonwualu@aust.edu.ng)

Table 1: FTIR data for Golden Palm, Bitter Kola, Sour Sop and Moringa Dry

| **Bond** | **Functional Group** | **Band Frequency (cm-1)** | | | |
| --- | --- | --- | --- | --- | --- |
| **Moringa Dry**  **(Leaves)** | **Sour sop (Leaves)** | **Bitter Kola (Nuts)** | **Golden Palm**  **(Leaves)** |
| C- O Stretching | Alcohol | 1013.8 | 1021.3 | 1013.8 | 1013.8 |
| C- O Stretching | Alcohol | 1207.7 | 1118.2 | 1252.4 | 1110.7 |
| N=O Stretching | Nitro (R–NO2) | 1453.7 | NP | NP |  |
| C–H Bending | Alkane (Methyl) | NP | 1446.2 | 1453.7 | 1446.2 |
| C=C Stretching | Alkene | 1654.9 | NP | 1640.0 | 1654.9 |
| C≡ C Stretching | Alkyne | NP | NP | NP | 2124.6 |
| C=O Stretching | Amide | NP | 1662.4 | NP | NP |
| O-H Stretching | Carboxylic Acids | 1736.9 | NP | NP | NP |
| C–H Stretching | Alkanes (Aldehyde) | 2855.1 | 2519.7 | 2929.7 | 2832.8 |
| C–H Stretching | Alkane | 2922.2 | 2832.8 | NP | 2944.6 |
| N–H stretching | 1°, 2° Amines and Amides | 3399.7 | 3317.3 | 3280.1 | 3294.9 |
| N=O Stretching | Nitro (R–NO2) | 1453.7 | NP | NP | NP |
| O-H Stretching | Alcohols, Phenols (Hydrogen Bonding) | NP | NP | 3280.0573 | 3294.9 |

Table 2: FTIR data for Jatropha Leave, Neem, Hisbiscus and Moringa Wet Before Dry

| **Bond** | **Functional Group** | **Band Frequency (cm-1)** | | | |
| --- | --- | --- | --- | --- | --- |
| **Moringa Wet Before Dry**  **(Leaves)** | **Hibiscus (Flower)** | **Neem (Leaves)** | **Jatropha**  **(Leaves)** |
| C- O Stretching | Alcohol | 1021.3 | 1021.3 | 1021.3 | 1021.3 |
| C- O Stretching | Alcohol | 1118.2 | 1118.2 | 1118.2 | 1118.2 |
| N=O Stretching | Nitro (R–NO2) | 1446.2 | NP | 1446.2 | NP |
| C–H Bending | Alkane (Methyl) | NP | 1446.2 | NP | 1416.2 |
| C=C Stretching | Alkene | 1662.4 | NP | NP | 1654.9 |
| C≡ C Stretching | Alkyne | NP | NP | NP | NP |
| C=O Stretching | Ester (Organic) | NP | 1736.9 | NP | NP |
| C=O Stretching | Amide | NP | NP | 1654.9 | NP |
| O-H Stretching | Carboxylic Acids | 2527.1 | 2519.7 | 2519.7 | 2519.7 |
| C–H Stretching | Alkanes (Aldehyde) | 2832.8 | 2832.8 | 2832.8 | 2832.8 |
| C–H Stretching | Alkane | NP | NP | NP | 2944.6 |
| N–H stretching | 1°, 2° Amines and Amides | 3309.9 | 3295.0 | 3302.4 | 3309.9 |
| N=O Stretching | Nitro (R–NO2) | NP | NP | NP | NP |
| O-H Stretching | Alcohols, Phenols (Hydrogen Bonding) | **NP** | **NP** | NP | NP |

Table 3: FTIR data for Jatropha Seeds, Yellow Bush, Orange Peel and Palm Tree

| **Bond** | **Functional Group** | **Band Frequency (cm-1)** | | | |
| --- | --- | --- | --- | --- | --- |
| **Palm Tree**  **(Leaves)** | **Orange Peel (Skin)** | **Yellow Bush (Leaves)** | **Jatropha**  **(Seeds)** |
| C–X Stretching | Chloride | NP | NP | 775.3 | NP |
| C–H | Aromatic  (Out-of-plane bend) | NP | NP | 872.2 | NP |
| C- O Stretching | Alcohol | 1021.3 | 1021.3 | 1073.5 | 1021.3 |
| C- O Stretching | Alcohol | 1118.2 | 1118.2 | 1162.9 | 1118.2 |
| N=O Stretching | Nitro (R–NO2) | NP | NP | NP | NP |
| C–H Bending | Alkane (Methyl) | 1446.2 | 1446.2 | 1386.6 | 1416.2 |
| C=C Stretching | Alkene | NP | NP | 1602.8 | 1669.8 |
| C≡ C Stretching | Alkyne | NP | NP | NP | 2519.7 |
| C=O Stretching | Ester (Organic) | NP | NP | NP | NP |
| C=O Stretching | Amide | 1669.8 | NP | 1699.7 | NP |
| O-H Stretching | Carboxylic Acids | 2519.7 | 1662.4 | NP | NP |
| C–H Stretching | Alkanes (Aldehyde) | 2832.8 | 2832.8 | 2922.2 | 2832.9 |
| C–H Stretching | Alkane | NP | NP | NP | NP |
| N–H stretching | 1°, 2° Amines and Amides | 3302.4 | 3309.9 | 3339.7 | 3309.9 |
| N=O Stretching | Nitro (R–NO2) | NP | NP | NP | NP |
| O-H Stretching | Alcohols, Phenols (Hydrogen Bonding) | NP | NP | NP | NP |

Table 4: GC MS result for major phytochemicals present in the plant extracts

| **Extracts** | **Major Phytochemicals Present/** Library/ID | **Area (%)** | **Extracts** | **Major Phytochemicals Present/** Library/ID | **Area (%)** |
| --- | --- | --- | --- | --- | --- |
| **Bitter Kola** | n-Hexadecanoic acid | 9.2 | **Golden Palm** | D-Limonene | 45.6 |
| Oleic Acid | 48.0 | Hexadecanoic acid, Methyl ester | 35.5 |
| 1-Nonadecene | 57.0 | 17-Pentatriacontene | 24.4 |
| **Hisbiscus Flower** | D-Limonene | 70.5 | 6,11-Dimethyl-2,6,10-dodecatrien-1-ol | 76.7 |
| Mercaptoacetic acid, 2TMS | 19.8 | 1-Docosene | 23.6 |
| **Jatropha Seeds** | Hexadecanoic acid, Methyl ester | 12.5 | 9-Eicosene, (E)- | 15.8 |
| 11-Octadecenoic acid, methyl ester, (Z)- | 8.7 | **Moringa Wet Before Dry** | 2-Butenoic acid, 3-methyl-2-[(trimethylsilyl)oxy]-, trimethylsilyl ester | 14.7 |
| Methyl stearate | 8.0 | Hexadecanoic acid, Methyl ester | 7.8 |
| 7-Hexadecenoic acid, Methyl ester, (Z)- | 6.0 | Limonene | 5.6 |
| Phytol | 6.1 | **Neem** | Z-2-Octadecen-1-ol | 14.4 |
| **Moringa Dry** | Hexadecanoic Acid, Methyl ester | 27.9 | Phytol | 11.5 |
| 9-Octadecenoic Acid (Z)-, Methyl ester | 12.1 | Tetradecanoic acid, 12-methyl-, methyl ester, (S)- | 10.4 |
| Methyl Stearate | 11.3 | Tetradecanal | 6.0 |
| **Orange Peel** | Hexadecanoic acid, Methyl ester | 15.3 | **Palm Tree** | D-Limonene | 65.9 |
| 1,5,9-Undecatriene, 2,6,10-trimethyl-, (Z)- | 12.4 | Heptadecanal | 6.2 |
| Terpineol | 12.1 | Silane, [[(3.beta.,11.beta.,20S)-pregn-5-ene-3,11,17,20-tetrayl]tetrakis(oxy)]tetrakis[trimethyl- | 3.5 |
| **Yellow Bush** | Hexadecanoic acid, Methyl ester | 15.3 | **Sour Sop** | D-Limonene | 61.0 |
| Terpineol | 12.1 | D-Limonene | 24.1 |
| 1,5,9-Undecatriene, 2,6,10-trimethyl-, (Z)- | 12.4 | D-Limonene | 28.3 |

Table 5: UV Vis Result for the twelve (12) Methanol Extracts

| **No.** | **Plant Extract Sample** | **Wavelength**  **(nm)** | **Identification of Phytochemicals** | **Aabsorbance (a.u.)** | **K * Abs** |
| --- | --- | --- | --- | --- | --- |
| 1 | Bitter Kola | 204 | Flavonoids 66 | 1.161 | 1.161 |
| 2 | Golden Palm | 448 | Flavonoids  Band I (300-380 nm) and band II (240-295 nm), Flavonoids  350-500 nm, Tannins  400-450 nm, Terpenoids  350-500 nm, Tannins  400-450 nm, Terpenoids  400-450 nm, Carotenoids  17,67 | 0.575 | 0.575 |
| 3 | Hibiscus | 660 | Flavonoids  600-700 nm, Chlorophyll 67 | 1.721 | 1.721 |
| 4 | Jatropha Leave | 320 | flavonoids 66  Band I (300-380 nm) and band II (240-295 nm), Flavonoids | 1.084 | 1.084 |
| 5 | Moringa Dry | 520 | Flavonoids [5]  Band I (300-380 nm) and band II (240-295 nm), Flavonoids  The peaks 404, 462, and 530 were characteristic for terpenoids. 66 | 1.208 | 1.208 |
| 6 | Moringa Wet and Dry | 520 | Flavonoids [5]  Band I (300-380 nm) and band II (240-295 nm), Flavonoids  The peaks 404, 462, and 530 were characteristic for terpenoids, 66 | 1.636 | 1.636 |
| 7 | Jatropha Seed | 320 | Flavonoids what is the wave length [52]  Band I (300-380 nm) and band II (240-295 nm), Flavonoids | 1.081 | 1.081 |
| 9 | Orange Peel | 660 | Flavonoids 66  Band I (300-380 nm) and band II (240-295 nm), Flavonoids | 0.325 | 0.325 |
| 10 | Palm Tree | 268 | Flavonoids 66  Band I (300-380 nm) and band II (240-295 nm), Flavonoids | 1.387 | 1.387 |
| 11 | Neem Leave | 448 | Flavonoids  Band I (300-380 nm) and band II (240-295 nm), Flavonoids  350-500 nm, Tannins  400-450 nm, Terpenoids  400-450 nm, Carotenoids 66 | 0.693 | 0.693 |
| 12 | Yellow Bush | 204 | Flavonoids 66  Band I (300-380 nm) and band II (240-295 nm), Flavonoids | 1.283 | 1.283 |
| 13 | Sour SOP | 432 | Flavonoids  Band I (300-380 nm) and band II (240-295 nm), Flavonoids  400-450 nm, Carotenoids 6,66 | 0.604 | 0.604 |

Table 6: Phytochemical Analysis

| **S/NO.** | **Plant Extracts** | **Functional Groups**  **(FTIR)** | **Phytochemical (UV-VIS)** | **Qualitative Analysis** | **Major Phytochemical (GC-MS)** |
| --- | --- | --- | --- | --- | --- |
| 1 | Bitter Kola  *Garcinia kola* | Alcohols, Phenols (hydrogen bonding), 1°, 2° amines and amides, Alkanes, Alkenes, carboxylic acids, esters, and ethers. | Flavonoids | Flavonoids, Alkaloids, Phenolics, Phytates, Saponins, Tannins and Cardiac glycosides | Oleic acid (14.1 %), n-Hexadecenoic acid (9.16 %), 1-Nonadecene (6.38 %), and 1-Docosene (5.06 %). |
| 2 | Golden Palm  *Dypsis lutescens* | Alcohols, Phenols (Hydrogen Bonding), 1°, 2° Amines and Amides, Alkanes, Alkenes, Carboxylic acids, Esters, and Ethers | Flavonoids  Carotenoids | Phenolic compounds such as Flavonoids, Tannins, Terpenoids, Alkaloids and Cumarins | 6,11-Dimethyl-2,6,10-dodecatrien-1-ol (76.7 %), D-Limonene (45.55 %), Hexadecenoic acid, methyl ester (35.534 %), Heptadecyl heptafluorobutyrate (27.82 %), 17-Pentatriacontene (24.44 %), 1-Docosene (23.64 %), 9-Eicosene, (E) (15.83 %), Tetradecanoic acid, 12-methyl-methyl ester, (S) (12.4 %), Undec-10-ynoic acid, tetradecyl ester 3(9.98 %), 6-Octadecenoic acid, methyl ester, (Z) (9.71 %), and Aspidospermidin-17-ol, 1-acetyl-19,21-epoxy-15,16-dimethoxy (8.81 %). |
| 3 | Hibiscus  *Hibiscus rosa-sinensis* | Acids, Alcohols, aliphatic (alkane, alkene, and alkyne), organic, amines and amides and aromatic | Flavonoids, alkaloids, and phenolic | Flavonoids, tannins, saponins, alkaloids and polyphenols. | D-Limonene (60.66 %), and 1,5-Pentanediol, 2TBDMS derivative (36. 38 %). |
| 4 | *Jatropha curcas*  (Seed and Leave) | Acids, alcohols, aliphatic (alkane, alkene, and alkyne), carboxylic acids, organic, amines and amides and aromatic | Flavonoids, Alkaloids, and Phenolic compounds | Tannins, Alkaloids, Phenols, Flavonoids, Glycosides and Saponins | **Leave**  D-Limonene (70.47 %), Mercaptoacetic acid, 2TMS derivative (19.82 %) and 9-Octadecenamide, (Z) (3.27 %).  **Seeds**  Hexadecanoic acid, methyl ester (12.50 %), 11-Octadecenoic acid, methyl ester, (Z) (8.71 %), Methyl stearate (8.02 %), Phytol (6.12 %), 7-Hexadecenoic acid, methyl ester, (Z) (6.01 %), 9,12-Octadecadienoic acid (Z,Z), methyl ester (5.22 %) and Dibutyl phthalate (5.04 %). |
| 5 | *Moringa oleifera*  (Dry and Wet Before Dry) | Acids, Alcohols, Aliphatic (Alkane, Alkene and Alkyne), Nitro, Aldehyde, Amines, and Amides. | Flavonoids, Alkaloids, Terpenoids, and Phenolic compounds | Alkaloids, saponins, tannins, steroids, phenolic acids, glucosinolates, flavonoids, and terpenes. | **Dry**  Hexadecanoic acid, methyl ester (27.91 %), 9-Octadecenoic acid (Z)-, methyl ester (12.12 %), Methyl stearate (11.33 %), 1,3-dicyclohexylpropene (5.73 %), Decanoic acid, methyl ester (4.59 %) and Tridecanoic acid, methyl ester (4.17 %).  **Wet and Dry**  2-Butenoic acid, 3-methyl-2-[(trimethylsilyl)oxy]-, trimethylsilyl ester (14.69 %), Hexadecanoic acid, methyl ester (7.84 %), Pentasiloxane, dodecamethyl (6.12 %), Limonene (5.51 %), Cyclohexene, 1-methyl-4-(1-methylethenyl) (S) (5.02 %). |
| 6 | *Azadirachta indica* (Neem) | Acids, alcohols, aliphatic (alkane, alkene, and alkyne), nitro, carboxylic acids, amines, and amides. | Flavonoids, Terpenoids | Flavonoids, alkaloids, terpenoids, and phenolic compounds | Z-2-Octadecen-1-ol (14.39 %), Phytol (11.52 %), Tetradecanoic acid, 12-methyl-, methyl ester, (S) (10.36 %), Tetradecanal (6.00 %), (Z)-Methyl heptadec-9-enoate (5.36 %), 2-Methyl-Z,Z-3,13-octadecadienol (5.17 %). |
| 7 | Orange peel | Acids, Alcohols, Aliphatic (Alkane, Alkene and Alkyne), Nitro, Carboxylic Acids, Amines, and Amides. | Alkaloids, Flavonoids and Phenolic compounds | Lemon Oil, D-limonene, Vitamin-C and pectin's | Hexadecanoic acid, methyl ester (15.34 %), 1,5,9-Undecatriene, 2,6,10-trimethyl-, (Z) (12.41 %), Terpineol (12.14 %), 9-Octadecenoic acid (Z)-, methyl ester (7.73 %), Methyl stearate (6.25 %). |
| 8 | Palm trees leave | Acids, Alcohols, Aliphatic (Alkane, Alkene and Alkyne), Amines and Amides. | Alkaloids, Flavonoids and Phenolic compounds | Flavonoids, Catechins, Steroids, Triterpenes, Tannins, and Saponins | D-Limonene (42.4035 %), D-Limonene (23.55), Heptadecanal (6.21 %), Silane, [[(3.beta.,11.beta.,20S)-pregn-5-ene-3,11,17,20-tetrayl]tetrakis(oxy)] (3.55 %) and n-Hexadecanoic acid (3.48 %). |
| 9 | Yellow Bush | Acids, Alcohols, aliphatic (Alkane, Alkene and Alkyne), Chloride, Nitro, Amines, and Amides. | Flavonoids | Flavonoids, glycoside, and saponins are abundantly present, resin, protein and reducing sugar | Hexadecanoic acid, methyl ester (15.3353 %), D1,5,9-Undecatriene, 2,6,10-trimethyl-, (Z) (12.4115 %), Terpineol (12.1382 % ), 9-Octadecenoic acid (Z)-, methyl ester (7.729 %), Methyl stearate (6.2501 %). |
| 10 | Sour Sop | Alcohols, Phenols (hydrogen bonding), 1°, 2° amines and amides, Alkanes, Alkenes, carboxylic acids, esters, and ethers. | Flavonoids and Carotenoids | Tannins, Flavonoid,  reducing sugar, terpenoid, glycoside, saponin and alkaloid | D-Limonene (94.61 %) |

Table 7:Phytochemical Synergism

| **S/NO.** | **Combinations** | **Target Phytochemicals** | **Synergistics** | **Mechanism/**  **Adsorption** | **Inhibitor type** | **Product Name** | **Target Inhibitor Function** |
| --- | --- | --- | --- | --- | --- | --- | --- |
| 1 | **Bitter Kola (*Garcinia kola*)-1**  [Oleic acid (14.1 %), n-Hexadecenoic acid (9.16 %), 1-Nonadecene (6.38 %), and 1-Docosene (5.06 %)]  +  ***Jatropha curcas* (Seed)-2**  [Hexadecanoic acid, methyl ester (12.50 %), 11-Octadecenoic acid, methyl ester, (Z) (8.71 %), Methyl stearate (8.02 %), Phytol (6.12 %), 7-Hexadecenoic acid, methyl ester, (Z) (6.01 %), 9,12-Octadecadienoic acid (Z,Z), methyl ester (5.22 %) and Dibutyl phthalate (5.04 %).]  +  ***Moringa oleifera*-3**  [Hexadecanoic acid, methyl ester (27.91 %), 9-Octadecenoic acid (Z)-, methyl ester (12.12 %), Methyl stearate (11.33 %), 1,3-dicyclohexylpropene (5.73 %), Decanoic acid, methyl ester (4.59 %) and Tridecanoic acid, methyl ester (4.17 %)]  +  **Orange peel-4**  [Hexadecanoic acid, methyl ester (15.34 %), 1,5,9-Undecatriene, 2,6,10-trimethyl-, (Z) (12.41 %), Terpineol (12.14 %), 9-Octadecenoic acid (Z)-, methyl ester (7.73 %), Methyl stearate 25 %)] | There is high concentration of Oleic acid, n-Hexadecenoic acid, methyl ester, Methyl stearate, and Cyclohexene  9-Octadecenoic acid (Z)-, methyl ester  5,9-Undecatriene, 2,6,10-trimethyl-, (Z)  Terpineol (Has antibacterial and antiseptic usage) | Combination of these phytochemicals would result in Increase bonding strength on substrate, type and number of bonding (), increasing layer compactness or cross link (molecules) to increase protection, complexing with atom as a solid within metal lattice, increase solubility in system fluid . | Increase corrosion potential  +  Increase polarization resistance.  +  Increase charge transfer resistance.  +  Strong antibacterial and MIC inhibition  (Hibiscus Extract)- Tannins and flavonoids  -bond orbital adsorption  Electrostatic adsorption  Chemisorption  Physisorption | Mixed type (Ambiodic function)-Anodic and Cathodic Multifunctional Chemical Inhibitor + Biocide.  It would act in an inductomeric manner (electron acceptor or donor characteristic being predominant. Varying these properties based on the system.  Inhibit the activities of bacteria and other micro-organisms | Greentreat-1234 | Effective at very low concentration and at minimum surface saturation  General purpose inhibitor, suitable for both high and low water cuts applications  Oil soluble and water dispersible type . |
| 2 | **Sour Sop 9**  D-Limonene (94.61 %)  +  **Golden Palm extract (Dypsis Lutescens)-5**  [6,11-Dimethyl-2,6,10-dodecatrien-1-ol (76.7 %), D-Limonene (45.55 %), Hexadecenoic acid, methyl ester (35.534 %), Heptadecyl heptafluorobutyrate (27.82 %), 17-Pentatriacontene (24.44 %), 1-Docosene (23.64 %), 9-Eicosene, (E) (15.83 %), Tetradecanoic acid, 12-methyl-methyl ester, (S) (12.4 %), Undec-10-ynoic acid, tetradecyl ester 3(9.98 %), 6-Octadecenoic acid, methyl ester, (Z) (9.71 %), and Aspidospermidin-17-ol, 1-acetyl-19,21-epoxy-15,16-dimethoxy (8.81 %)]  +  **Hibiscus extract (*Hibiscus Sabdariffa* ) - 6**  [D-Limonene (60.66 %), and 1,5-Pentanediol, 2TBDMS derivative (36. 38 %).]  +  ***Jatropha curcas* extract (Leave)-2**  D-Limonene (70.47 %), Mercaptoacetic acid, 2TMS derivative (19.82 %) and 9-Octadecenamide, (Z) (3.27 %)]  +  **Palm tree leave extract -7**  [D-Limonene (42.4035 %), D-Limonene (23.55), Heptadecanal (6.21 %), Silane, [[(3. beta.,11.beta.,20S)-pregn-5-ene-3,11,17,20-tetrayl]tetrakis(oxy)] (3.55 %) and n-Hexadecanoic acid (3.48 %)]. | D-Limonene (High Coverage area in all the extracts),  6,11-Dimethyl-2,6,10-dodecatrien-1-ol,  1,5-Pentanediol, 2TBDMS derivative,  Mercaptoacetic acid, 2TMS derivative (Acetic acid, [(trimethylsilyl)thio]-, trimethylsilyl ester  9-Octadecenamide, (Z)    Silane, [[(3. beta.,11.beta.,20S)-pregn-5-ene-3,11,17,20-tetrayl]tetrakis(oxy)] | Combination of these phytochemicals would result in inhibitor effectiveness been improved by:  Increasing size of organic molecule, aromaticity/conjugated bonding, carbon chain length, bonding strength on substrate, type and number of bonding (), increasing layer compactness or cross link (molecules) to increase protection, complexing with atom as a solid within metal lattice, increase solubility in system fluid | Increase corrosion potential.  +  Increase polarization resistance.  +  Increase charge transfer resistance.  + Strong antibacterial and MIC inhibition (tannins and flavonoids)  + Effective for inhibiting pipeline with sludge due to high D-Limonene content;  -bond orbital adsorption  Electrostatic adsorption  Chemisorption  Physisorption | Mixed type (Ambiodic function)-anodic and cathodic inhibitor It would act in an inductomeric manner (electron acceptor or donor characteristic being predominant. Varying these properties based on the system | Greentreat-95627 | Effective at very low concentration and at minimum surface saturation  Moderate temperature and hydrodynamic stability due to Silane complex.  Suitable for inhibiting produced water lines with Moderate to high TDS  Suitable for crude oil with high to moderate water cuts (corrosion protection of transfer pipeline and flow lines)  When used the dissolved iron content in the water chemistry analysis results may be high due to the de-sludging and inhibiting effect of D-Limonene |
| 3 | ***Azadirachta indica* (Neem)-8**  [Z-2-Octadecen-1-ol (14.39 %), Phytol (11.52 %), Tetradecanoic acid, 12-methyl-, methyl ester, (S) (10.36 %), Tetradecanal (6.00 %), (Z)-Methyl heptadec-9-enoate (5.36 %), 2-Methyl-Z,Z-3,13-octadecadienol (5.17 %)]  +  **Golden Palm-5**  [6,11-Dimethyl-2,6,10-dodecatrien-1-ol (76.7 %), D-Limonene (45.55 %), Hexadecenoic acid, methyl ester (35.534 %), Heptadecyl heptafluorobutyrate (27.82 %), 17-Pentatriacontene (24.44 %), 1-Docosene (23.64 %), 9-Eicosene, (E) (15.83 %), Tetradecanoic acid, 12-methyl-methyl ester, (S) (12.4 %), Undec-10-ynoic acid, tetradecyl ester 3(9.98 %), 6-Octadecenoic acid, methyl ester, (Z) (9.71 %), and Aspidospermidin-17-ol, 1-acetyl-19,21-epoxy-15,16-dimethoxy (8.81 %).]. | There is high concentration Z-2-Octadecen-1-ol  Hexadecenoic acid,  D-Limonene,  methyl ester,  6,11-Dimethyl-2,6,10-dodecatrien-1-ol, methyl ester  Heptadecyl heptafluorobutyrate  17-Pentatriacontene  Heptadecyl heptafluorobutyrate  17-Pentatriacontene  1-Docosene  9-Eicosene,  Tetradecanoic acid,  12-methyl-methyl ester, (S) | Combination of these phytochemicals would result in inhibitor effectiveness been increased via:  Increasing size of organic molecule, aromaticity/conjugated bonding, carbon chain length, bonding strength on substrate, type and number of bonding (), increase solubility in system fluid. | Increase corrosion potential.  +  Increase polarization resistance.  +  Increase charge transfer resistance.  -bond orbital adsorption  Electrostatic adsorption  Chemisorption  Physisorption | Mixed type (Ambiodic function)-anodic and cathodic inhibitor It would act in an inductomeric manner (electron acceptor or donor characteristic being predominant. Varying these properties based on the system | Greentreat-85 | Effective at very low concentration and at minimum surface saturation  Oil soluble and water dispersible type suitable for crude with low water cut and low Base Sediment water. Corrosion protection of stabilized crude oil pipeline and export pipelines |

Table 8: Dominant Phytochemical Structures

| **S/NO.** | **Combinations** | **Target Phytochemicals** | **Product Name** | **Formula** | **2D Structure** |
| --- | --- | --- | --- | --- | --- |
| **1** | **Bitter Kola (*Garcinia Kola*) -1**  [Oleic acid (14.1 %),  n-Hexadecenoic acid (9.16 %),  1-Nonadecene (6.38 %), and  1-Docosene (5.06 %)]  +  ***Jatropha curcas* (Seed)-2**  [Hexadecanoic acid, methyl ester (12.50 %), 11-Octadecenoic acid, methyl ester, (Z) (8.71 %), Methyl stearate (8.02 %), Phytol (6.12 %), 7-Hexadecenoic acid, methyl ester, (Z) (6.01 %), 9,12-Octadecadienoic acid (Z, Z), methyl ester (5.22 %) and Dibutyl phthalate (5.04 %).]  +  ***Moringa oleifera*-3**  [Hexadecanoic acid, methyl ester (27.91 %), 9-Octadecenoic acid (Z)-, methyl ester (12.12 %), Methyl stearate (11.33 %), 1,3-dicyclohexylpropene (5.73 %), Decanoic acid, methyl ester (4.59 %) and Tridecanoic acid, methyl ester (4.17 %)]  +  **Orange peel-4**  [Hexadecanoic acid, methyl ester (15.34 %), 1,5,9-Undecatriene, 2,6,10-trimethyl-, (Z) (12.41 %), Terpineol (12.14 %), 9-Octadecenoic acid (Z)-, methyl ester (7.73 %), Methyl stearate (6.25 %)] | There is high concentration of Oleic acid, n-Hexadecenoic acid, methyl ester, Methyl stearate, and Cyclohexene  9-Octadecenoic acid (Z)-, methyl ester  5,9-Undecatriene, 2,6,10-trimethyl-, (Z)  Terpineol (Has antibacterial and antiseptic usage) | Greentreat-1234 | Oleic acid  C18H34O2 | 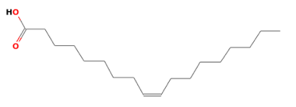 |
| Greentreat-1234 | n-Hexadecenoic acid | 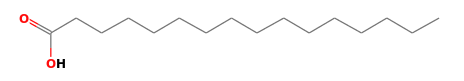 |
| Greentreat-1234 | Methyl ester, Methyl stearate | 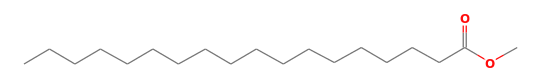 |
| Greentreat-1234 | Cyclohexene  C6H10 | 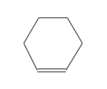 |
| Greentreat-1234 | 9-Octadecenoic acid (Z)-, methyl ester | 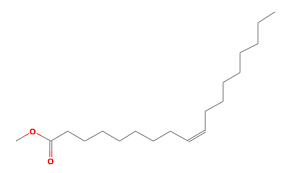 |
| Greentreat-1234 | 1,5,9-Undecatriene, 2,6,10-trimethyl-, (Z) | 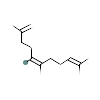 |
| Greentreat-1234 | Terpineol | 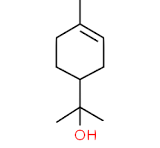 |
| Greentreat-1234 | Hexadecanoic acid, methyl ester | 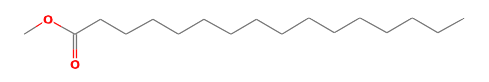 |
| Greentreat-1234 | 11-Octadecenoic acid, methyl ester, (Z) | 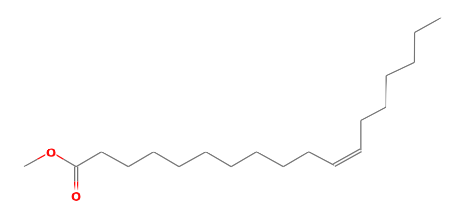 |
| Greentreat-1234 | Phytol  C20H40O | 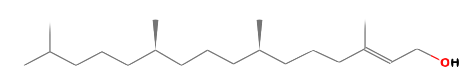 |
| Greentreat-1234 | Dibutyl phthalate  C16H22O4 | 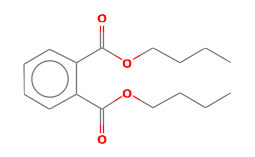 |
| Greentreat-1234 | 1,3-dicyclohexylpropene  C15H28 | 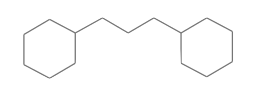 |
| Greentreat-1234 | Decanoic acid, methyl ester  C11H22O2 | 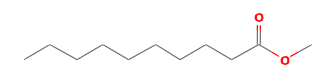 |
|  | Tridecanoic acid, methyl ester  C14H28O2 | 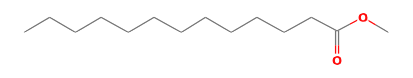 |
|  | 1-Nonadecene | 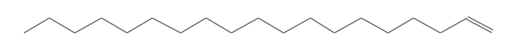 |
|  | | | | | |
| **2** | **Sour Sop 9**  D-Limonene (94.61 %)  +  **Golden Palm extract (*Dypsis lutescens*)-5**  [6,11-Dimethyl-2,6,10-dodecatrien-1-ol (76.7 %), D-Limonene (45.55 %), Hexadecenoic acid, methyl ester (35.534 %), Heptadecyl heptafluorobutyrate (27.82 %), 17-Pentatriacontene (24.44 %), 1-Docosene (23.64 %), 9-Eicosene, (E) (15.83 %), Tetradecanoic acid, 12-methyl-methyl ester, (S) (12.4 %), Undec-10-ynoic acid, tetradecyl ester 3(9.98 %), 6-Octadecenoic acid, methyl ester, (Z) (9.71 %), and Aspidospermidin-17-ol, 1-acetyl-19,21-epoxy-15,16-dimethoxy (8.81 %)]  +  **Hibiscus extract (*Hibiscus Sabdariffa*) - 6**  [D-Limonene (60.66 %), and 1,5-Pentanediol, 2TBDMS derivative (36. 38 %).]  +  ***Jatropha curcas* extract (Leave)-2**  D-Limonene (70.47 %), Mercaptoacetic acid, 2TMS derivative (19.82 %) and 9-Octadecenamide, (Z) (3.27 %)]  +  **Palm tree leave extract -7**  [D-Limonene (42.4035 %), D-Limonene (23.55), Heptadecanal (6.21 %), Silane, [[(3. beta.,11.beta.,20S)-pregn-5-ene-3,11,17,20-tetrayl]tetrakis(oxy)] (3.55 %) and n-Hexadecanoic acid (3.48 %)]. | D-Limonene (High Coverage area in all the extracts),  6,11-Dimethyl-2,6,10-dodecatrien-1-ol,  1,5-Pentanediol, 2TBDMS derivative,  Mercaptoacetic acid, 2TMS derivative (Acetic acid, [(trimethylsilyl)thio]-, trimethylsilyl ester  9-Octadecenamide, (Z)    Silane, [[(3. beta.,11.beta.,20S)-pregn-5-ene-3,11,17,20-tetrayl]tetrakis(oxy)]  Aspidospermidin-17-ol, 1-acetyl-19,21-epoxy-15,16-dimethoxy | Greentreat-95627 | D-Limonene  C10H16 | 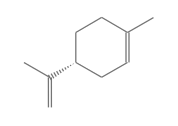 |
| Greentreat-95627 | 6,11-Dimethyl-2,6,10-dodecatrien-1-ol,  C14H24O | 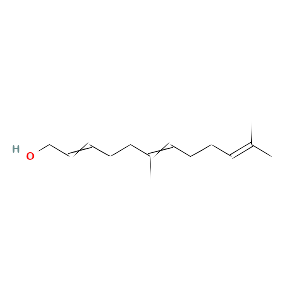 |
| Greentreat-95627 | 1,5-Pentanediol, 2TBDMS derivative,  C17H40O2Si2 | 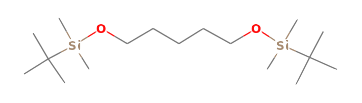 |
| Greentreat-95627 | Mercaptoacetic acid, 2TMS derivative (Acetic acid, [(trimethylsilyl)thio]-, trimethylsilyl ester  C8H20O2SSi2 | 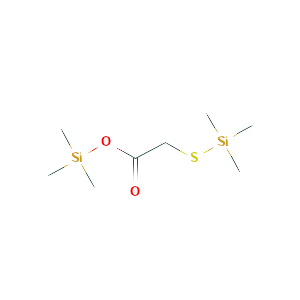 |
| Greentreat-95627 | Silane, [[(3. beta.,11. beta.,20S) -pregn-5-ene-3,11,17,20-tetrayl] tetrakis(oxy)]  C33H36O4Si4 | 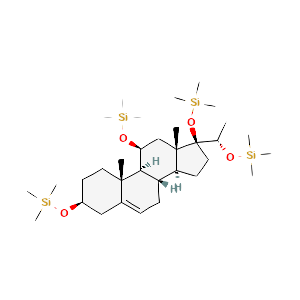 |
